# Supplementary material
Source: PubMed Central journal article supplement (PMC6589347)
Supplement: NIHMS1526150-supplement-1.pdf [file NIHMS1526150-supplement-1.pdf]

**Supplemental Table 1. Adjusted models for severe morbidity during postpartum readmissions with comorbidity index inclusive of maternal age**

|                           | Adjusted risk ratio | 95% CI     |
|---------------------------|---------------------|------------|
| <b>Race</b>               |                     |            |
| Non-Hispanic white        | 1.00                | Reference  |
| Non-Hispanic black        | 1.20                | 1.14, 1.26 |
| Hispanic                  | 0.93                | 0.88, 0.99 |
| Asian or Pacific Islander | 1.06                | 0.95, 1.18 |
| Native American           | 1.09                | 0.90, 1.33 |
| Other                     | 1.05                | 0.95, 1.16 |
| Unknown                   | 1.04                | 0.96, 1.13 |
| <b>Year</b>               |                     |            |
| 2012                      | 1.00                | Reference  |
| 2013                      | 1.04                | 0.99, 1.09 |
| 2014                      | 1.04                | 0.99, 1.09 |
| <b>Hospital bed size</b>  |                     |            |
| Small                     | 1.00                | Reference  |
| Medium                    | 1.03                | 0.96, 1.10 |
| Large                     | 1.07                | 1.00, 1.13 |
| <b>Insurance status</b>   |                     |            |
| Private                   | 1.00                | Reference  |
| Medicare                  | 1.01                | 0.91, 1.12 |
| Medicaid                  | 0.95                | 0.91, 0.99 |
| Other                     | 0.99                | 0.90, 1.10 |
| Uninsured                 | 0.83                | 0.74, 0.92 |
| <b>Hospital Location</b>  |                     |            |
| Urban non-teaching        | 1.00                | Reference  |
| Rural                     | 1.00                | 0.93, 1.09 |
| Urban teaching            | 1.00                | 0.96, 1.05 |
| <b>Income Quartile</b>    |                     |            |
| 1 <sup>st</sup> (lowest)  | 1.00                | Reference  |
| 2nd                       | 1.00                | 0.95, 1.05 |
| 3rd                       | 0.98                | 0.93, 1.03 |
| 4 <sup>th</sup> (highest) | 0.95                | 0.89, 1.01 |
| <b>Hospital Region</b>    |                     |            |
| Northeast                 | 1.00                | Reference  |
| Midwest                   | 1.21                | 1.13, 1.29 |
| South                     | 1.27                | 1.19, 1.34 |
| West                      | 1.26                | 1.17, 1.35 |
| <b>Comorbidity index</b>  |                     |            |
| 0                         | 1.00                | Reference  |
| 1-2                       | 1.30                | 1.24, 1.35 |
| >2                        | 3.14                | 2.98, 3.31 |

Adjusted model included all factors in this table (race, year, bed size, insurance status, hospital location, income quartile, hospital region, and comorbidity index score).
